# Supplementary material for: Genomic characterization of the most barotolerant Listeria monocytogenes RO15 strain compared to reference strains used to evaluate food high pressure processing
Source: PubMed Central journal article supplement (PMC7331262; doi:10.1186/s12864-020-06819-0), 2020-07-02

| ARO Term                    | AMR Gene Family                                            | Resistance Mechanism         | % Identity of Matching Region |       |        |       |       |       |       |       |       |       |
|-----------------------------|------------------------------------------------------------|------------------------------|-------------------------------|-------|--------|-------|-------|-------|-------|-------|-------|-------|
|                             |                                                            |                              | RO15                          | C7    | ScottA | 2HF33 | MB5   | F3265 | EGD-e | RO4   | AB199 | AB120 |
| FosX                        | fosfomycin thiol transferase                               | antibiotic inactivation      | 93.98                         | 93.98 | 100    | 92.48 | 92.48 | 100   | 92.48 | 92.48 | 93.98 | 93.98 |
| lin                         | lincosamide nucleotidyltransferase (LNU)                   | antibiotic inactivation      | 98.28                         | 98.85 | 97.9   | 98.09 | 98.28 | 97.9  | 100   | 98.09 | 100   | 100   |
| Listeria monocytogenes mprF | defensin resistant mprF                                    | antibiotic target alteration | 100                           | 100   | 99.29  | 100   | 99.88 | 99.42 | 100   | 100   | 100   | 100   |
| norB                        | major facilitator superfamily (MFS) antibiotic efflux pump | antibiotic efflux            | 98.07                         | 99.57 | 99.36  | 100   | 100   | 99.14 | 100   | 100   | 100   | 100   |

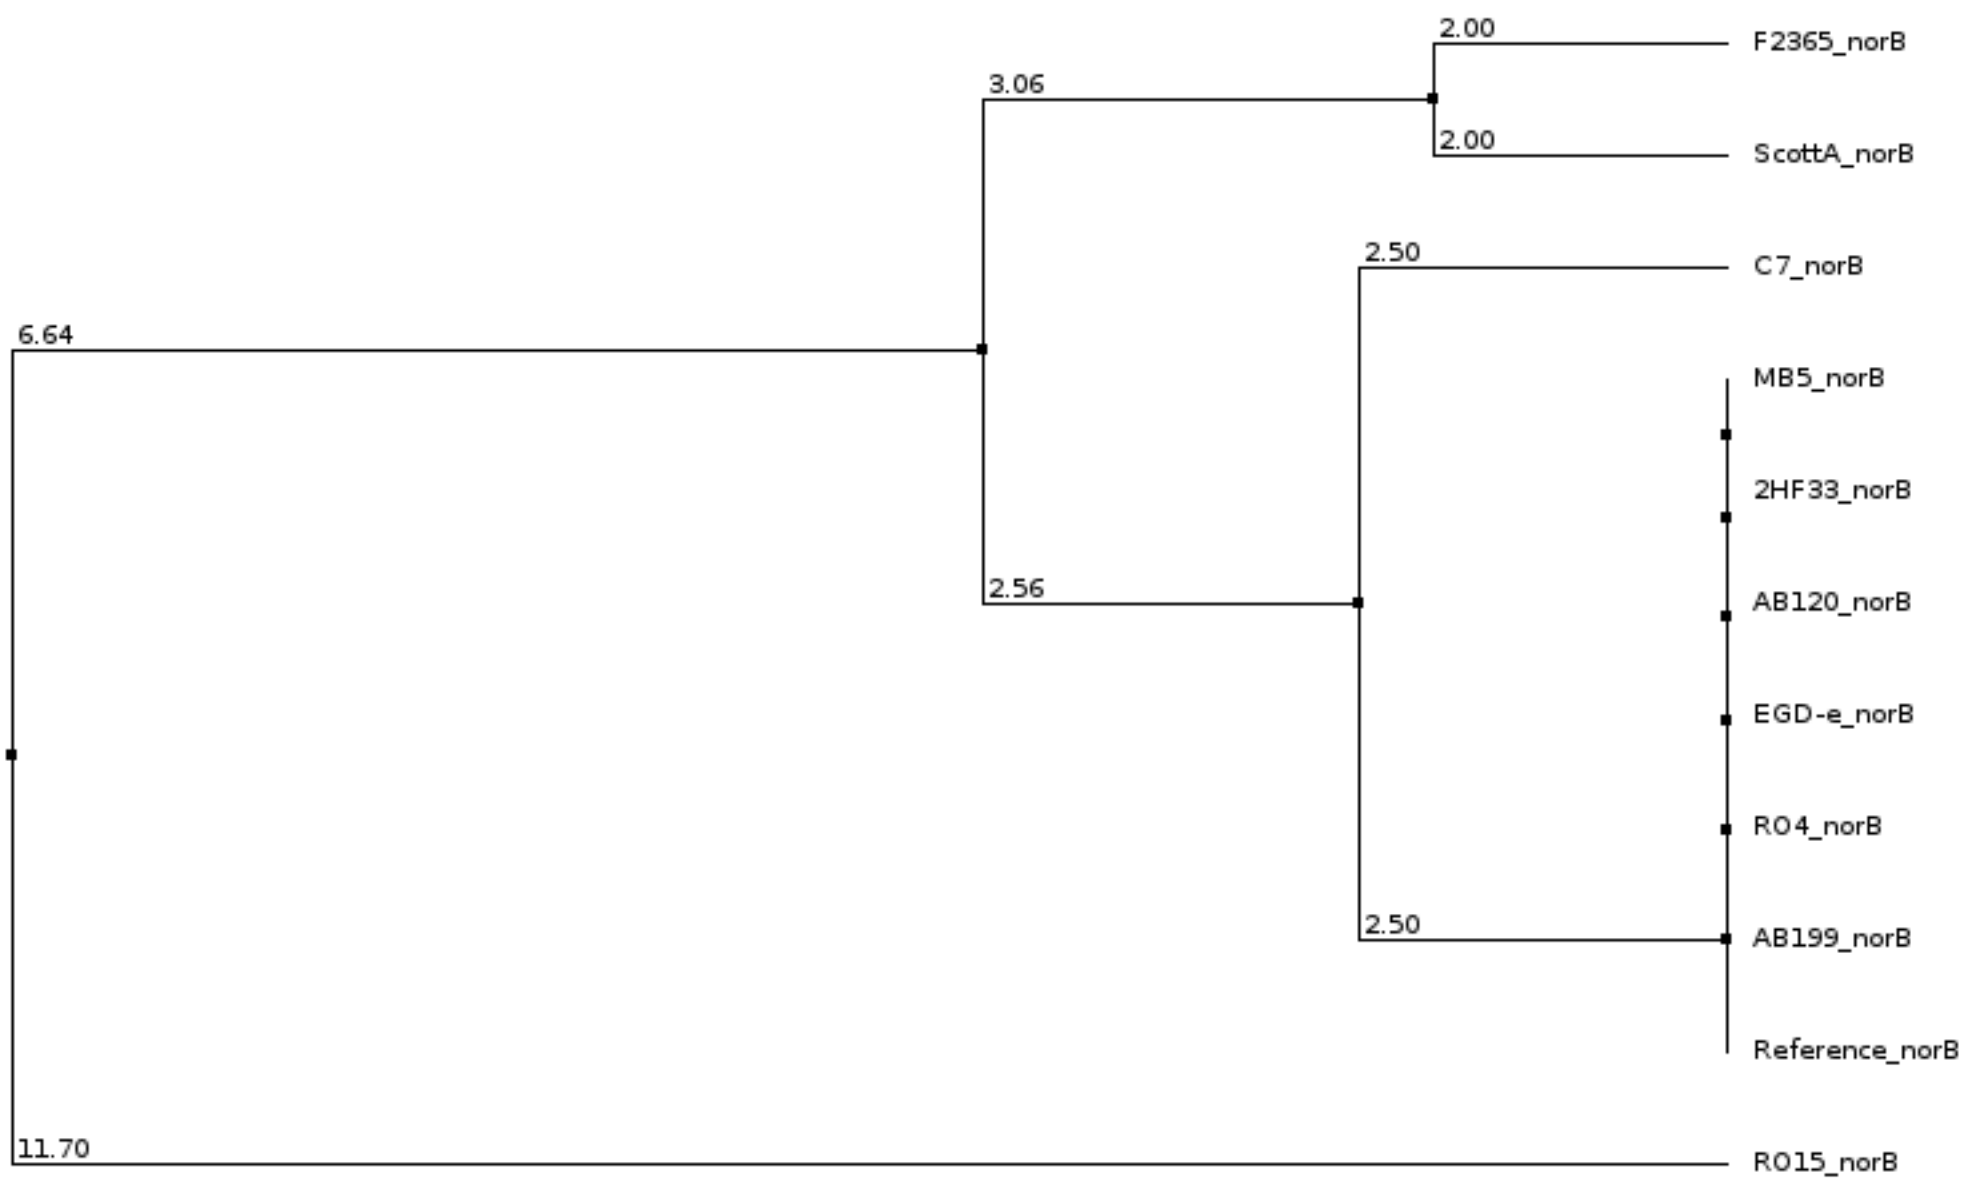

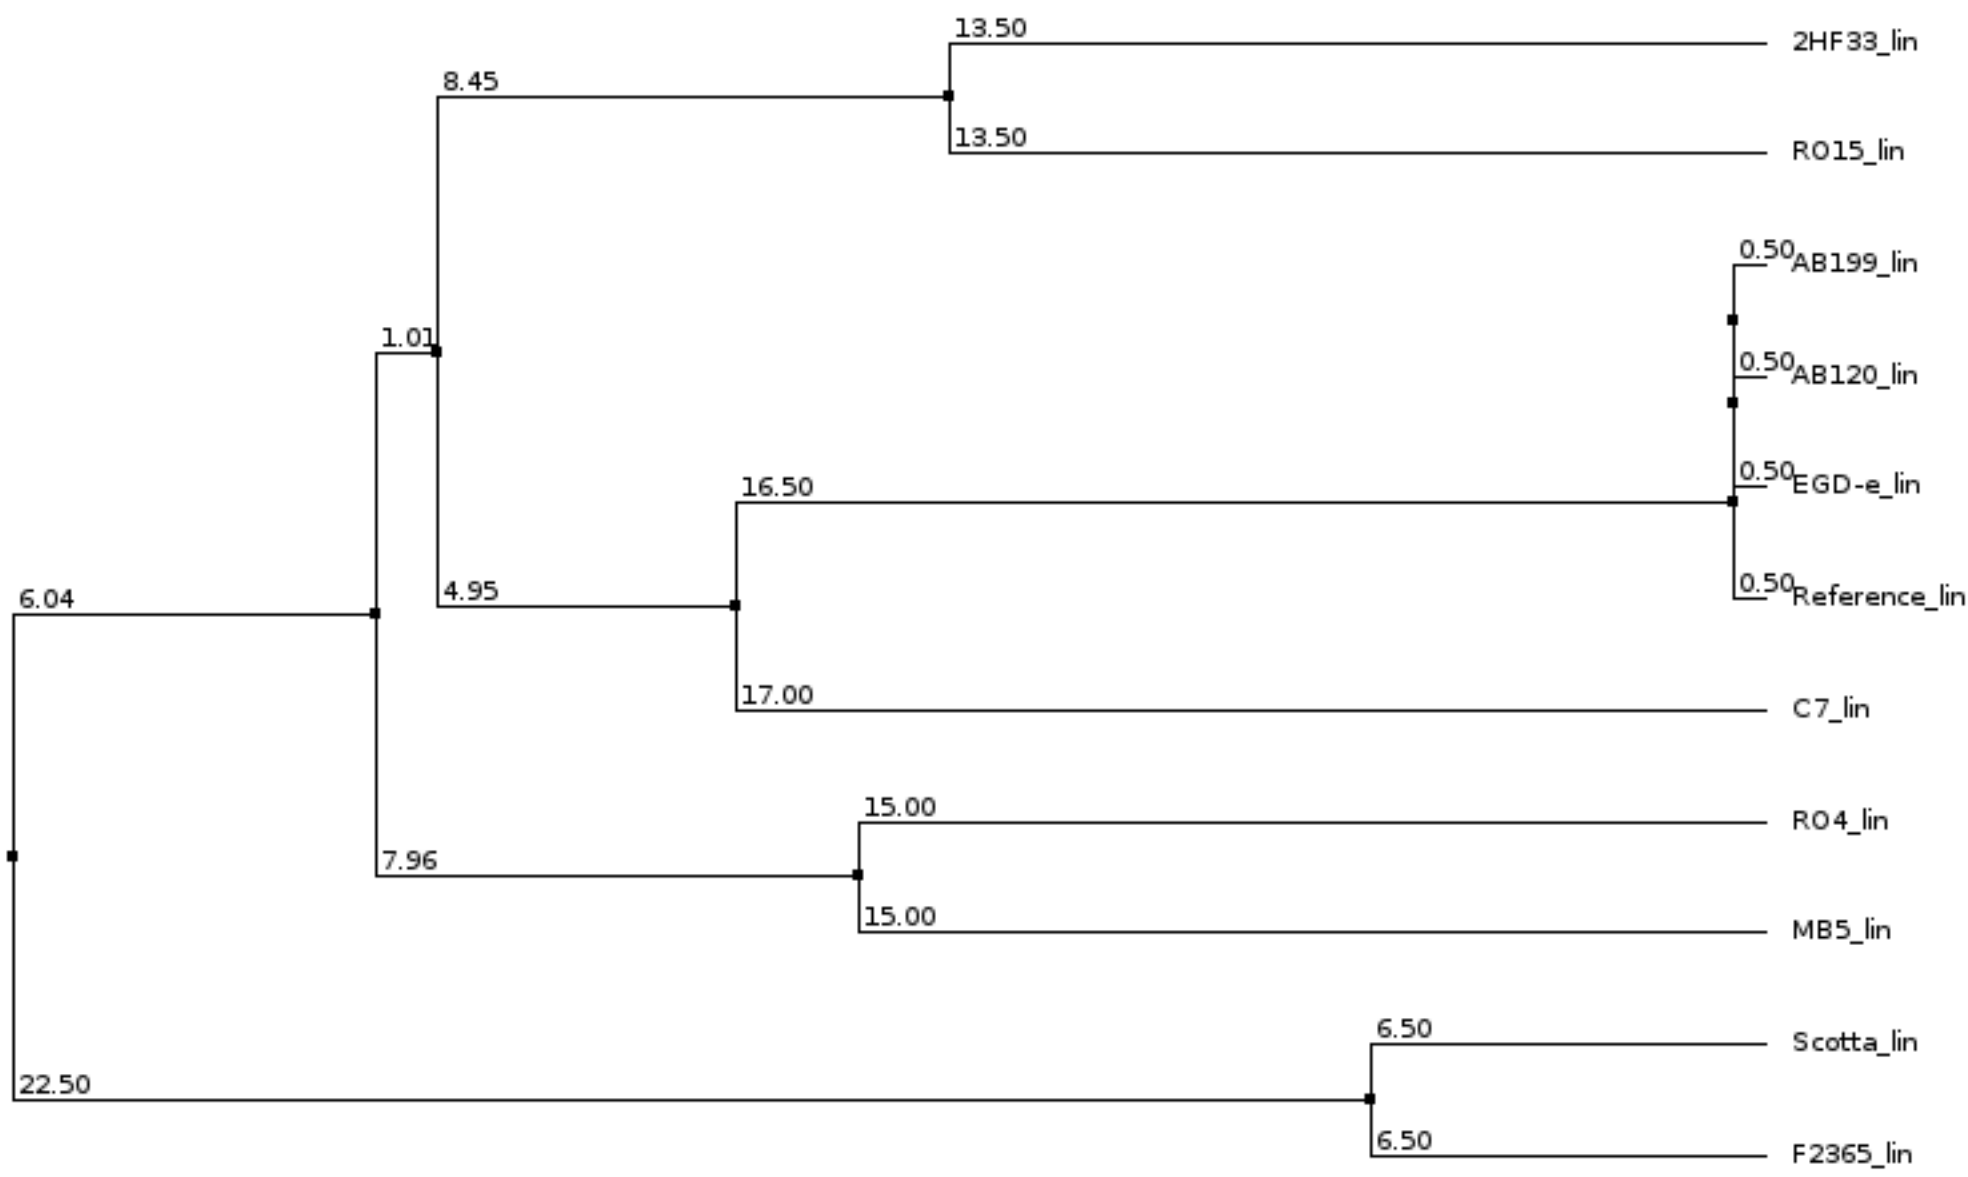

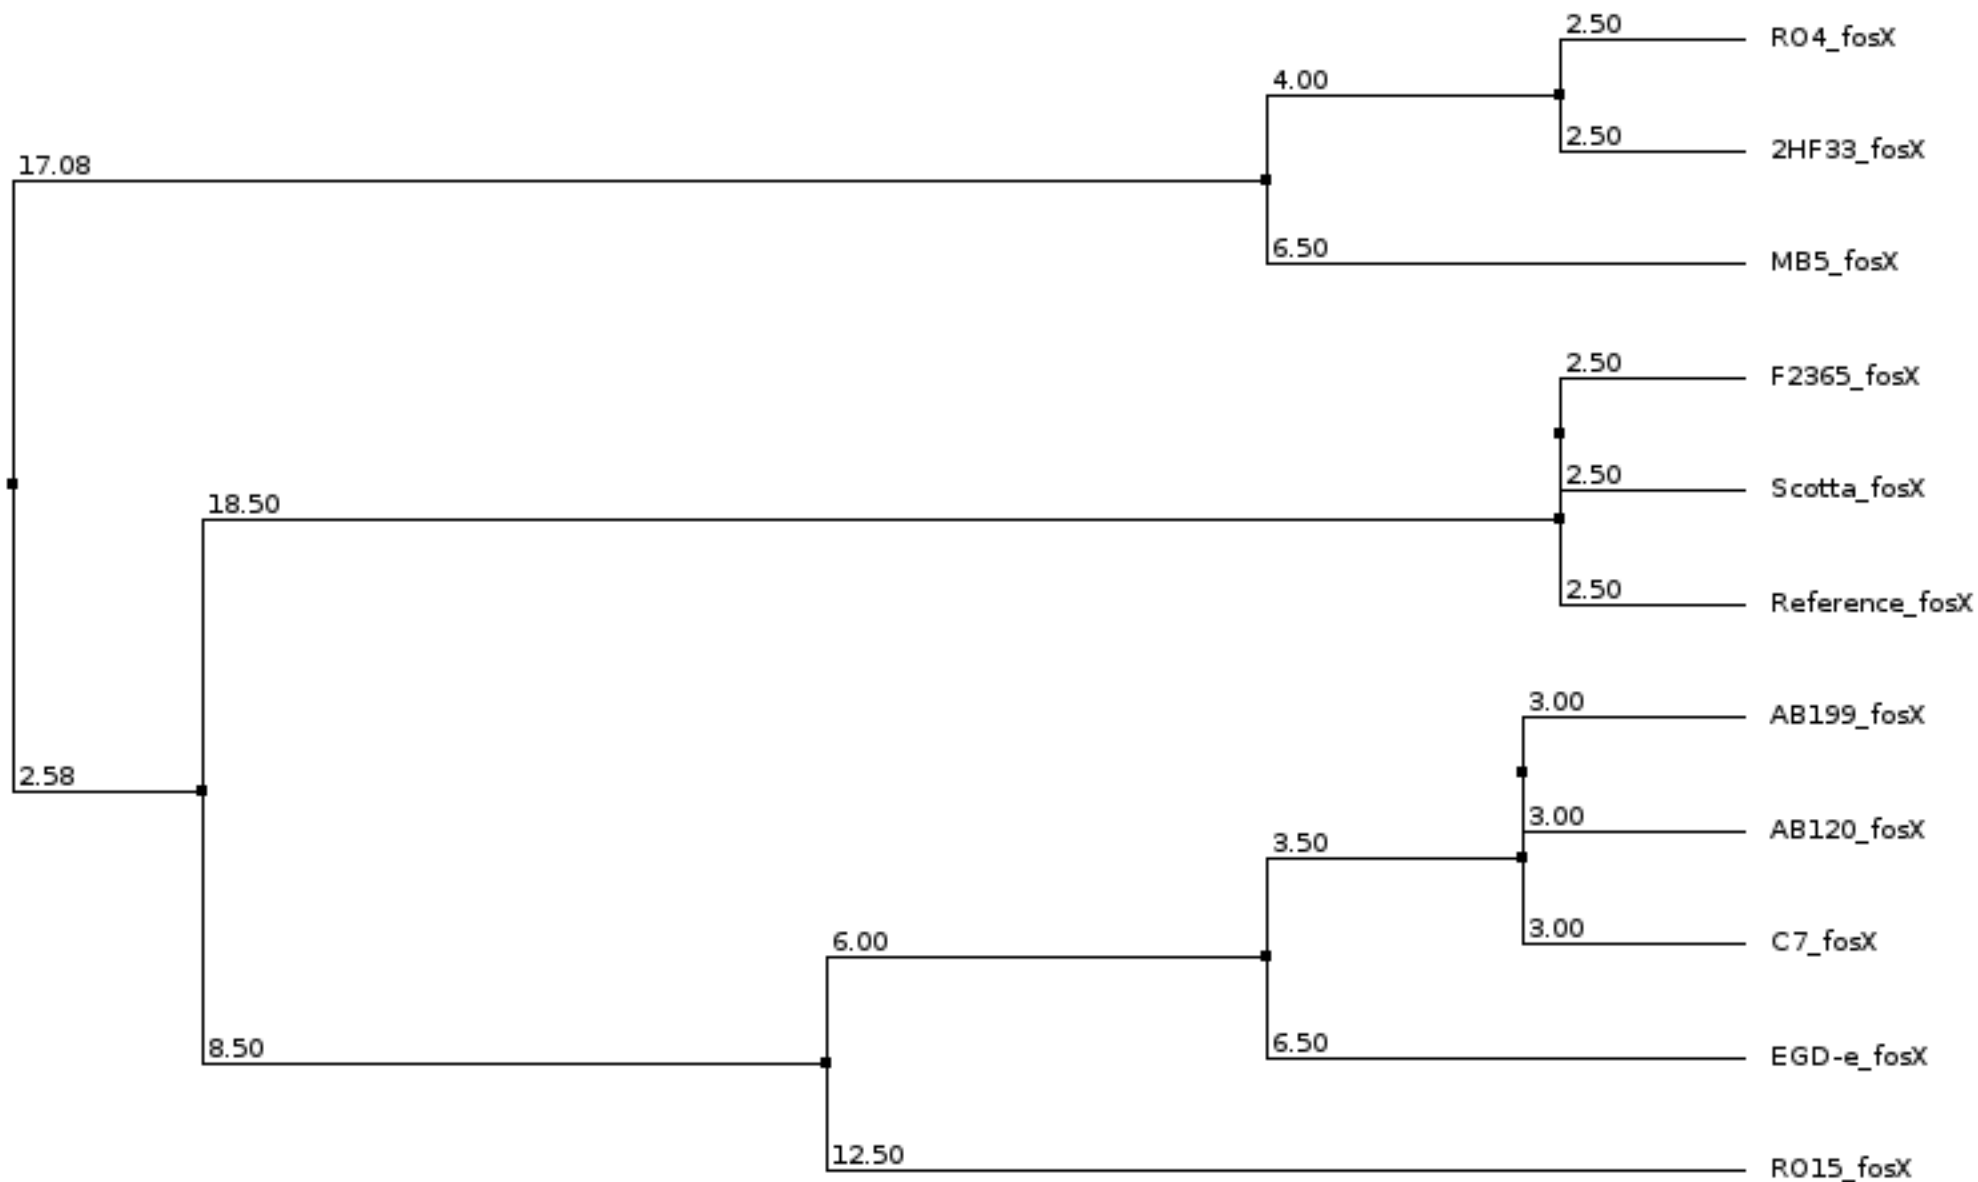

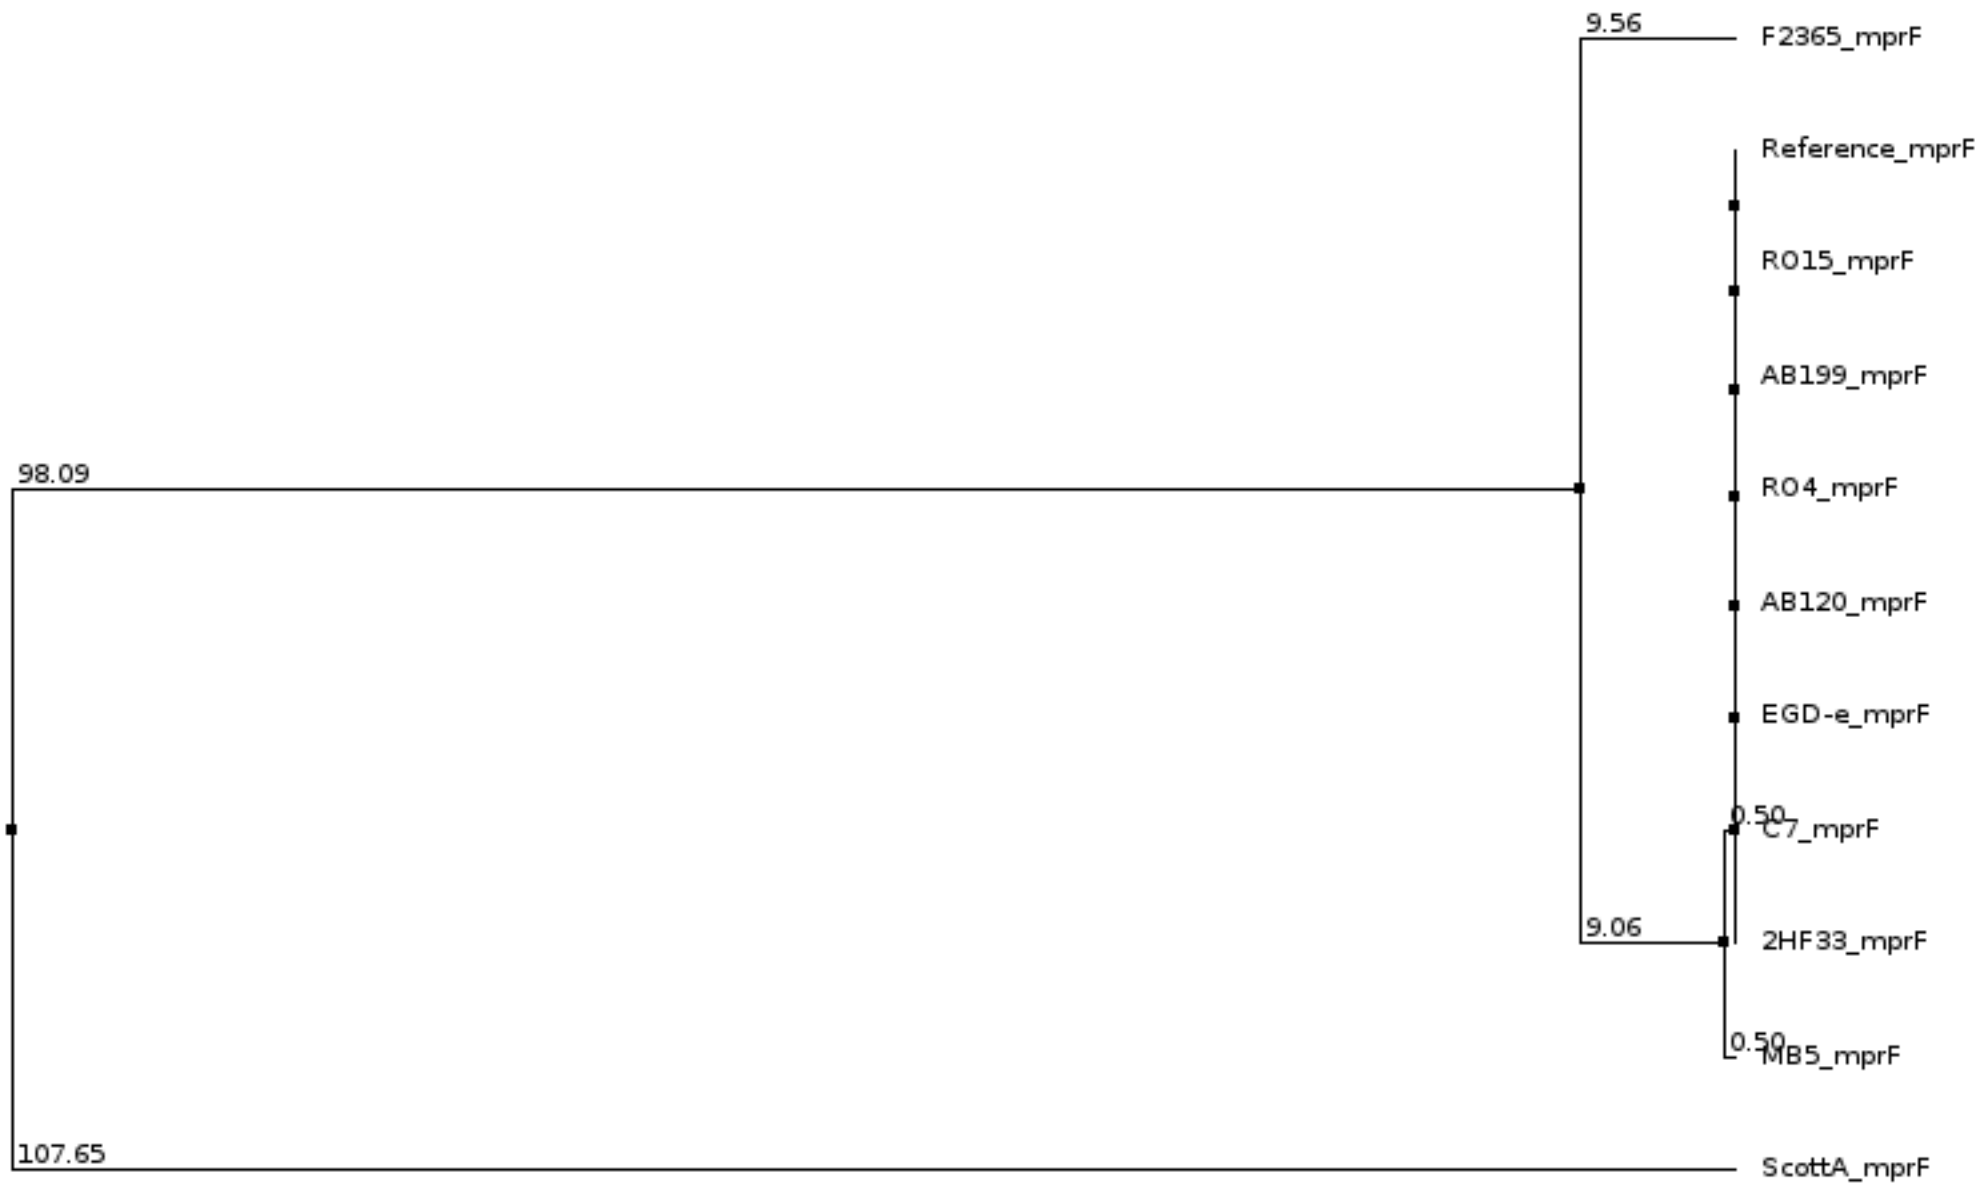

Supplement: 12864_2020_6819_MOESM5_ESM.pdf [file 12864_2020_6819_MOESM5_ESM.pdf]
